# Supplementary material for: Diversification and selection pattern of CYP6B genes in Japanese Papilio butterflies and their association with host plant spectra
Source: PeerJ. 2020 Dec 22;8:e10625. doi: 10.7717/peerj.10625 (PMC7761194; doi:10.7717/peerj.10625)
Supplement: Supplemental Information 5 [file peerj-08-10625-s005.xlsx]

## Sheet: Sheet1
		Each Franocoumarin amount µg/g(DW)
	rep	psoralen	angelicin	xanthotoxin	bergapten	isobergapten	isopimpinellin	imperatorin	isoimperatorin
Citrus depressa	1	0	0	0	1.12062	0	0	0.0388203	0.105192
Citrus depressa	2	0	0	0	1.03346	0	0	0.0171272	0.0662655
Citrus depressa	3	0	0	0	0.804421	0	0	0.00667588	0.0431824
Citrus junos	1	0	0	0	0.800568	0	0	0.276967	0
Citrus junos	2	0	0	0	0.344706	0	0	0.13616	0
Citrus junos	3	0	0	0	0.0520809	0	0	0.0682267	0
Citrus limon	1	0	0	0	4.28432	0	0.00651803	0.0709662	1.18265
Citrus limon	2	0	0	0	4.77689	0	0.00358082	0.0496142	1.3224
Citrus limon	3	0	0	0	4.78841	0	0.00339775	0.0706956	1.09998
Citrus trifoliata	1	0.00118089	0.00521462	0.0183699	0.426924	0.0177051	0.759941	0.658702	2.89763
Citrus trifoliata	2	0.0014808	0.00098669	0.0188665	0.316322	0.0239392	0.654112	0.662364	3.0761
Citrus trifoliata	3	0.000877142	0.00291452	0.0182699	0.340076	0.0207995	0.765567	0.751522	3.07127
Citrus unshiu	1	0.000866746	0.00173748	0.00313539	0.0687857	0.0148809	0.00253678	0.0192646	0.00557147
Citrus unshiu	2	0.000481263	0.00160291	0.00210077	0.0158616	0.0125079	0.00311803	0.00264595	0.00371174
Citrus unshiu	3	0.000333121	0.00400703	0.00334987	0.0523018	0.0213373	0.00596688	0.0117313	0.0127293
Orixa japonica	1	0.713345	0.0613533	3.63914	59.4143	0.0927841	13.1053	13.2897	3.83056
Orixa japonica	2	0.780463	0.0234445	4.34106	71.1343	0.406284	15.3836	14.9303	2.3553
Orixa japonica	3	0.729336	0.0877362	4.43741	66.1947	0.386682	13.8895	13.8198	3.87208
Phellodendron amurense	1	0.00359167	0.023413	0.0106891	0.184184	0.0850456	0.0210922	0.0487855	0.0271485
Phellodendron amurense	2	0.00485415	0.0103718	0.013847	0.281443	0.104043	0.034343	0.00991939	0.0476956
Phellodendron amurense	3	0.00346419	0.0211626	0.00132428	0.0365434	0.0683398	0.00165926	0.0136628	0.0975943
Skimmia japonica	1	0	0	0	3.24636	0	0.243944	9.45896	272.94
Skimmia japonica	2	0	0	0	2.78968	0	0.221126	8.89083	238.415
Skimmia japonica	3	0	0	0	3.66957	0	0.191648	7.20881	226.242
Toddalia asiatica	1	0	0	0.000908258	0.0195101	0.0147605	0.000892806	0.00376987	0.00888744
Toddalia asiatica	2	0	0	0.000328311	0.0313881	0.0144494	0.00105638	0.00116438	0.00435425
Toddalia asiatica	3	0	0	0.00138814	0.0296174	0.0140329	0.000910188	0.00466144	0.001604
Zanthoxylum ailanthoides	1	0.0898657	0.00268945	0.525587	1.60906	0.0319428	0.316946	0.00423938	0.00454678
Zanthoxylum ailanthoides	2	0.0789032	0.0008386	0.496913	1.41976	0.0278341	0.251717	0.00330113	0.00193292
Zanthoxylum ailanthoides	3	0.090843	0.000655383	0.464673	1.23541	0.00909796	0.279318	0.00470134	0.0026168
Zanthoxylum armatum	1	0	0	0	0	0	0	0.249708	0
Zanthoxylum armatum	2	0	0	0	0	0	0	0.221975	0
Zanthoxylum armatum	3	0	0	0	0	0	0	0.222505	0
Zanthoxylum piperitum	1	0.0299178	0.00503221	0.00570888	0.72273	0.12025	0.00692369	19.2199	0.335842
Zanthoxylum piperitum	2	0.0303166	0.00775076	0.00552055	0.961269	0.170745	0.00247093	20.5304	0.366623
Zanthoxylum piperitum	3	0.035605	0.0324118	0.00187475	0.760298	0.0295503	0.0106284	18.9939	0.337859
Zanthoxylum schinifolium	1	0.000138355	0.000506278	0.000777085	0.00340262	0.0108409	0.0035229	0.000864313	0.00774367
Zanthoxylum schinifolium	2	7.61599e-05	0.000505525	0.00021437	0.00827015	0.0016941	0.000247309	2.27044e-05	0.000727932
Zanthoxylum schinifolium	3	6.85316e-05	0.000791564	0.000670253	0.00680164	0.0101653	0.00115248	0.000699007	0.00308802
